# Supplementary material
Source: PubMed Central journal article supplement (PMC3349876)

Figure S1

Mouse mammary cells

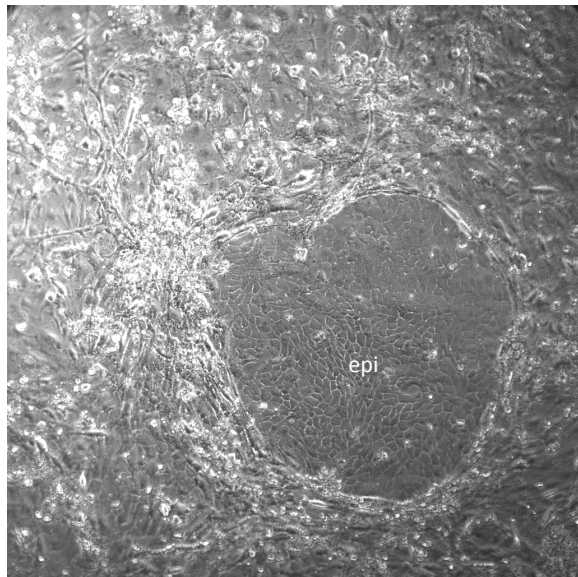

Mouse prostate cells

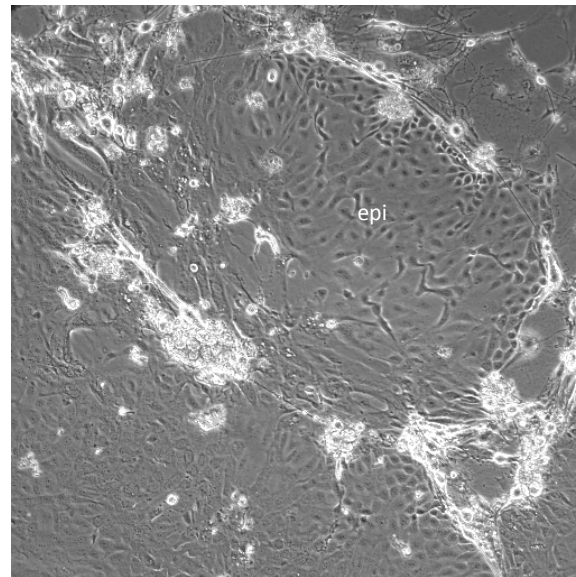

Mouse hepatocytes

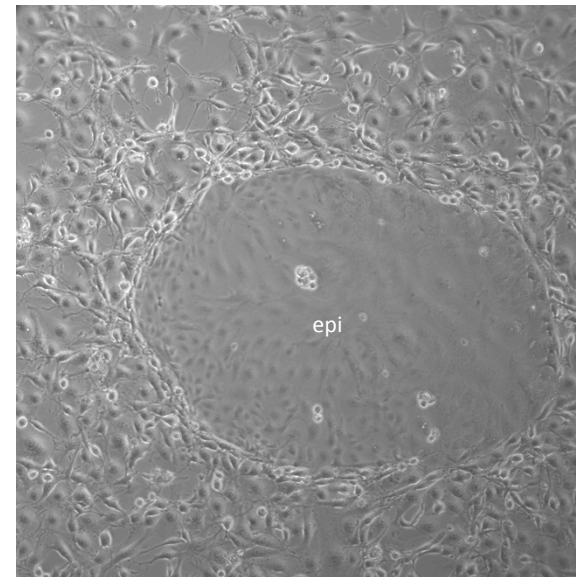

Mouse mammary cells with different genetic backgrounds

mMEC FVB

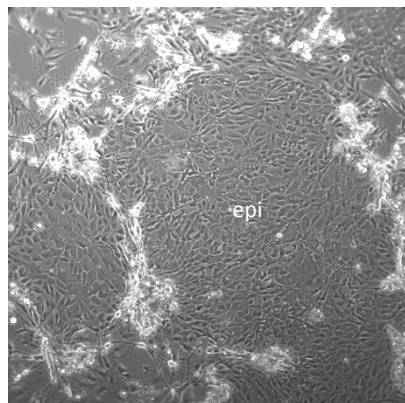

mMEC  $\Delta 3$

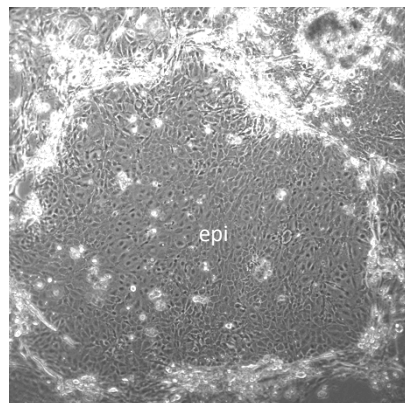

mMEC AIB up

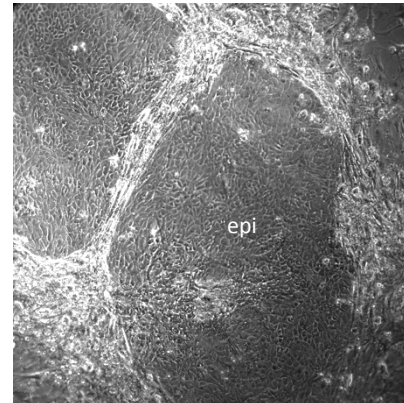

mMEC her2

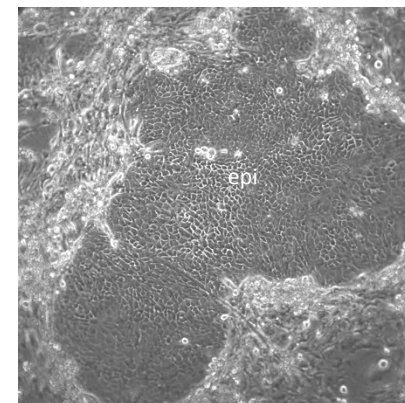

Supplement: mmc1.pdf [file mmc1.pdf]
