# Supplementary material
Source: PubMed Central journal article supplement (PMC3349876)

Figure S2

Normal rat breast cells

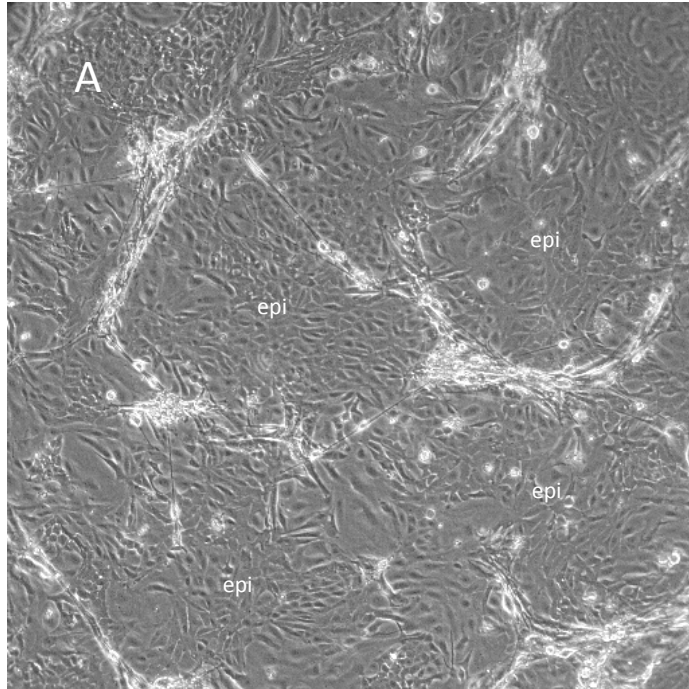

Rat breast tumor cells  
from needle biopsy

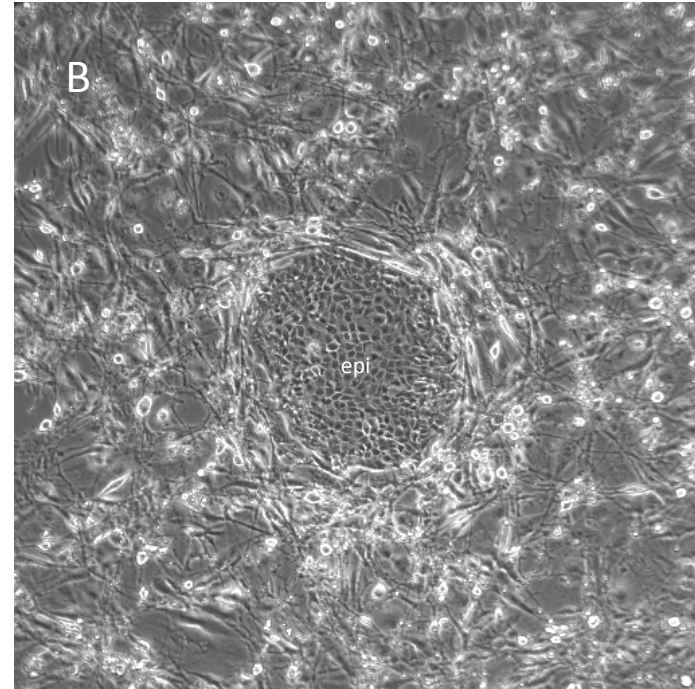

Supplement: mmc2.pdf [file mmc2.pdf]

Figure S3

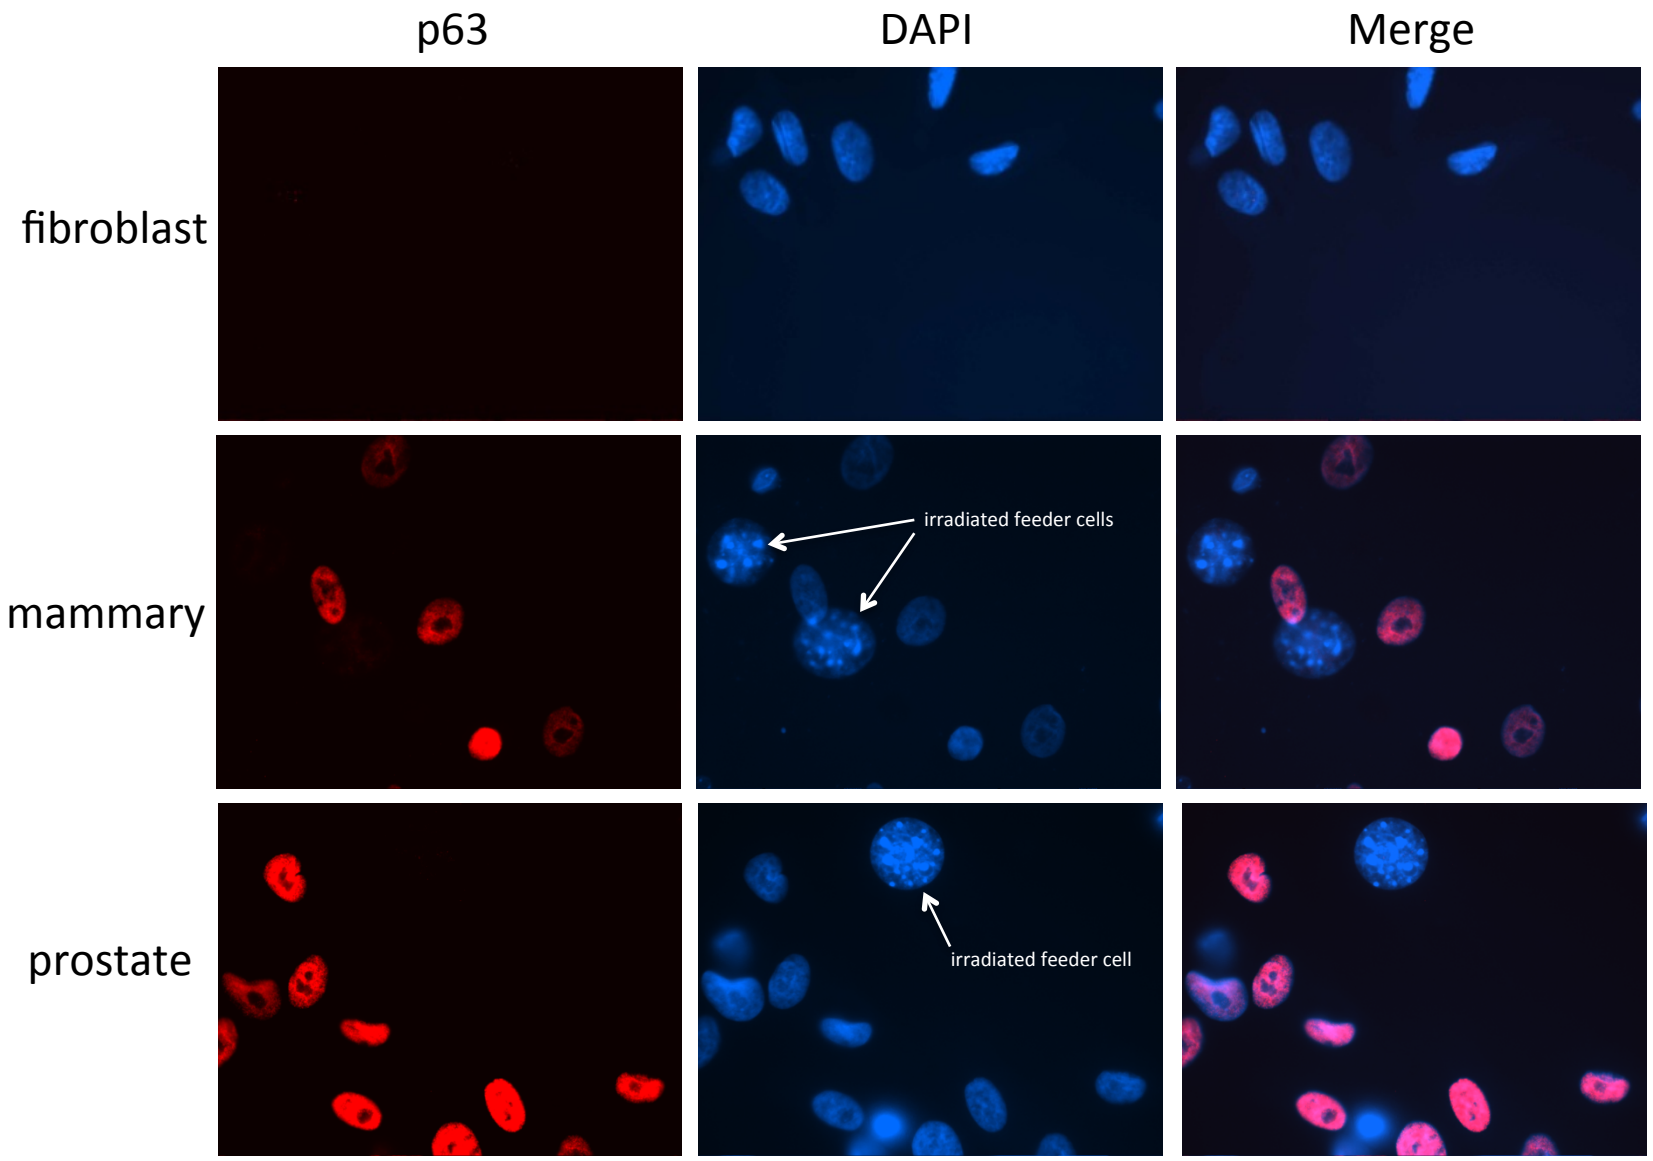

Supplement: mmc3.pdf [file mmc3.pdf]

Figure S4

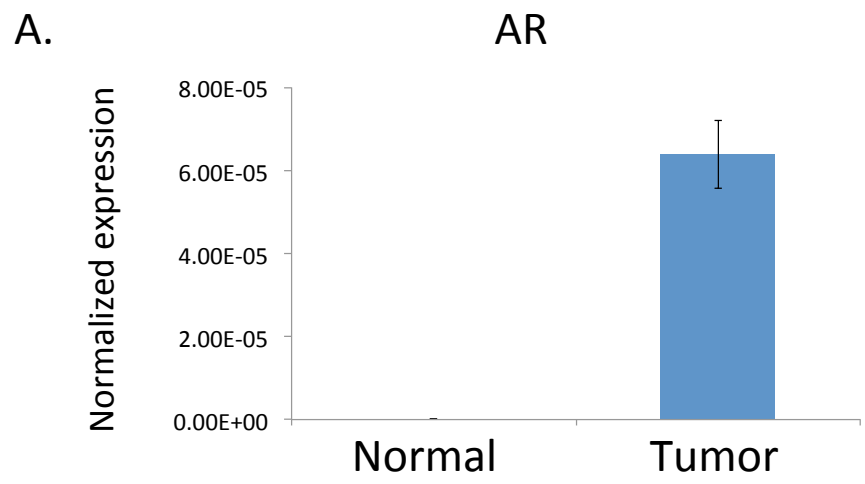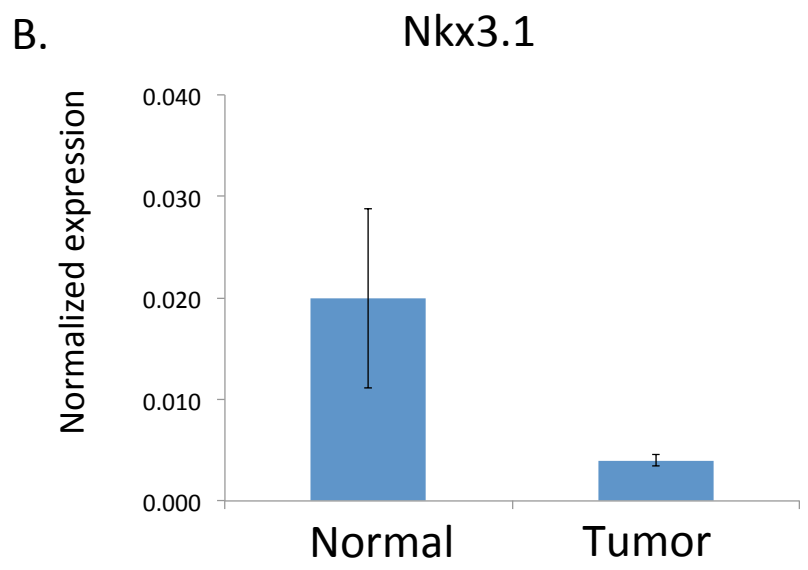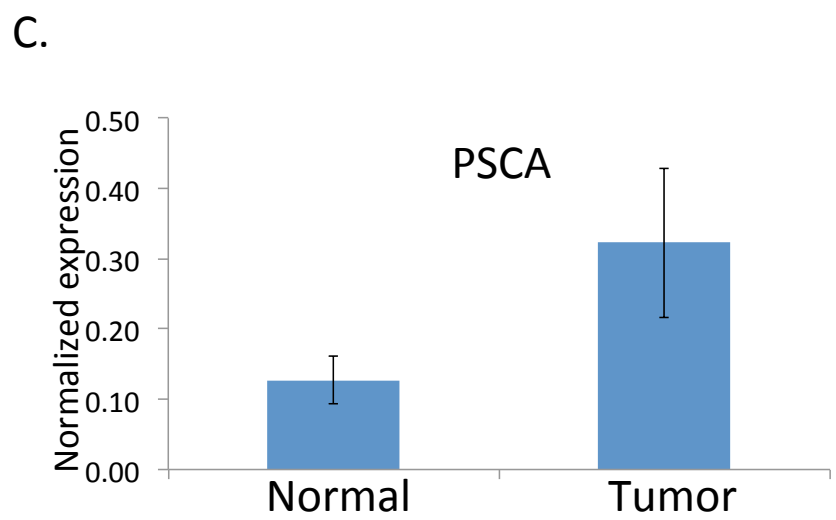

Supplement: mmc4.pdf [file mmc4.pdf]

Figure S5

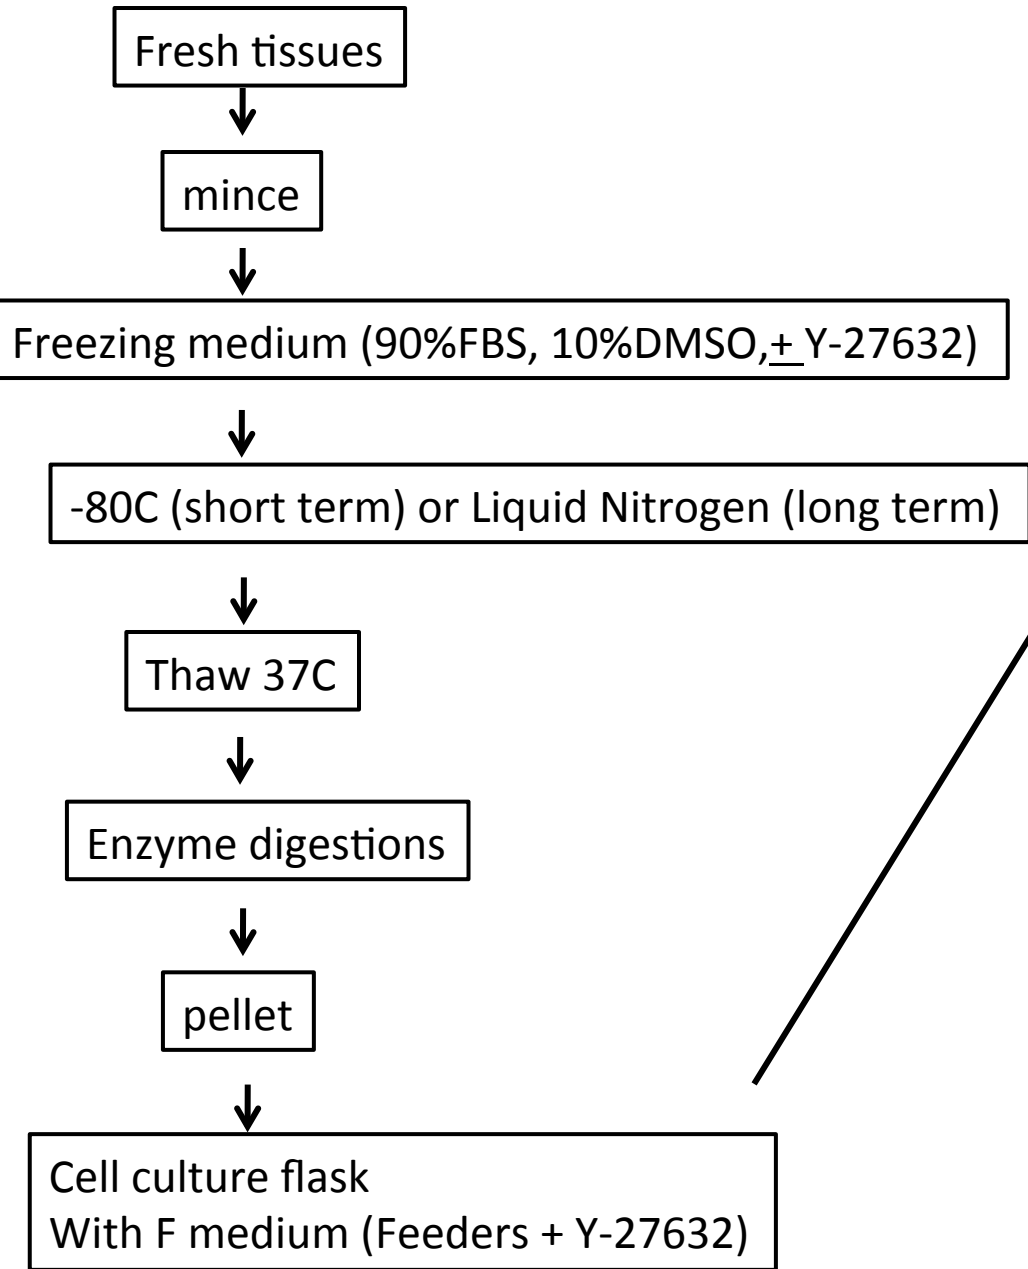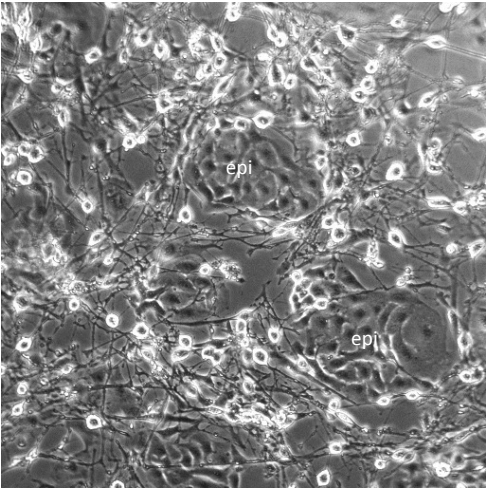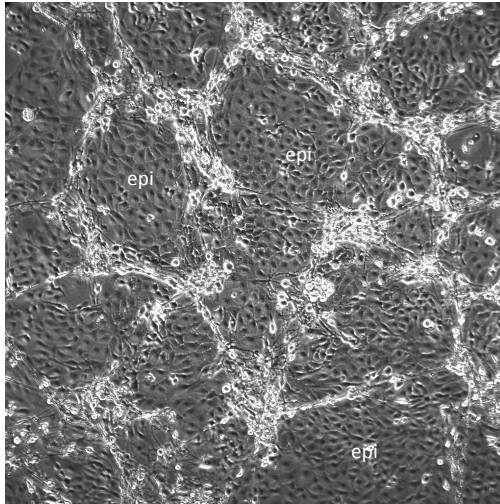

Supplement: mmc5.pdf [file mmc5.pdf]
